# Supplementary material
Source: PubMed Central journal article supplement (PMC2988682)
Supplement: NIHMS200340-supplement-Supplemental_Material.pdf [file NIHMS200340-supplement-Supplemental_Material.pdf]

Supplemental Table 1. Data of Individual Experiments on Lifespan in Response to 8 mM Oxaloacetate

| Expt Number | Control Median LS | OAA Median LS | Percent Increase | Log Rank p value <sup>1</sup> | Control Max LS | OAA Max LS | Percent Increase |
|-------------|-------------------|---------------|------------------|-------------------------------|----------------|------------|------------------|
| 1           | 13.2              | 17.9          | 35%              | <<0.001                       | 27             | 31         | 15%              |
| 2           | 12.8              | 14.2          | 11%              | <0.02                         | 16             | 19         | 19%              |
| 3           | 17.8              | 25.6          | 43%              | <<0.001                       | 33             | 35         | 6%               |
| 4           | 14.6              | 16.8          | 15%              | <<0.001                       | 17             | 19         | 12%              |
| 5           | 13.4              | 15.4          | 15%              | <0.04                         | 25             | 28         | 12%              |
|             | Mean Increase     |               | 25%              |                               | Mean Increase  |            | 13%              |

<sup>1</sup>Fisher's Combined Probability Test of Log Rank p values of median lifespan,  $p < < 0.001$ . One-way ANOVA analysis of median lifespan,  $p < < 0.001$ . Student's t-test of data on maximum lifespan combined from all experiments ( $n = 5$ ),  $p < 0.005$ .
